# Supplementary material
Source: PubMed Central journal article supplement (PMC5736431)
Supplement: NIHMS914808-supplement-1.pdf [file NIHMS914808-supplement-1.pdf]

**Supplemental Figure 1.**

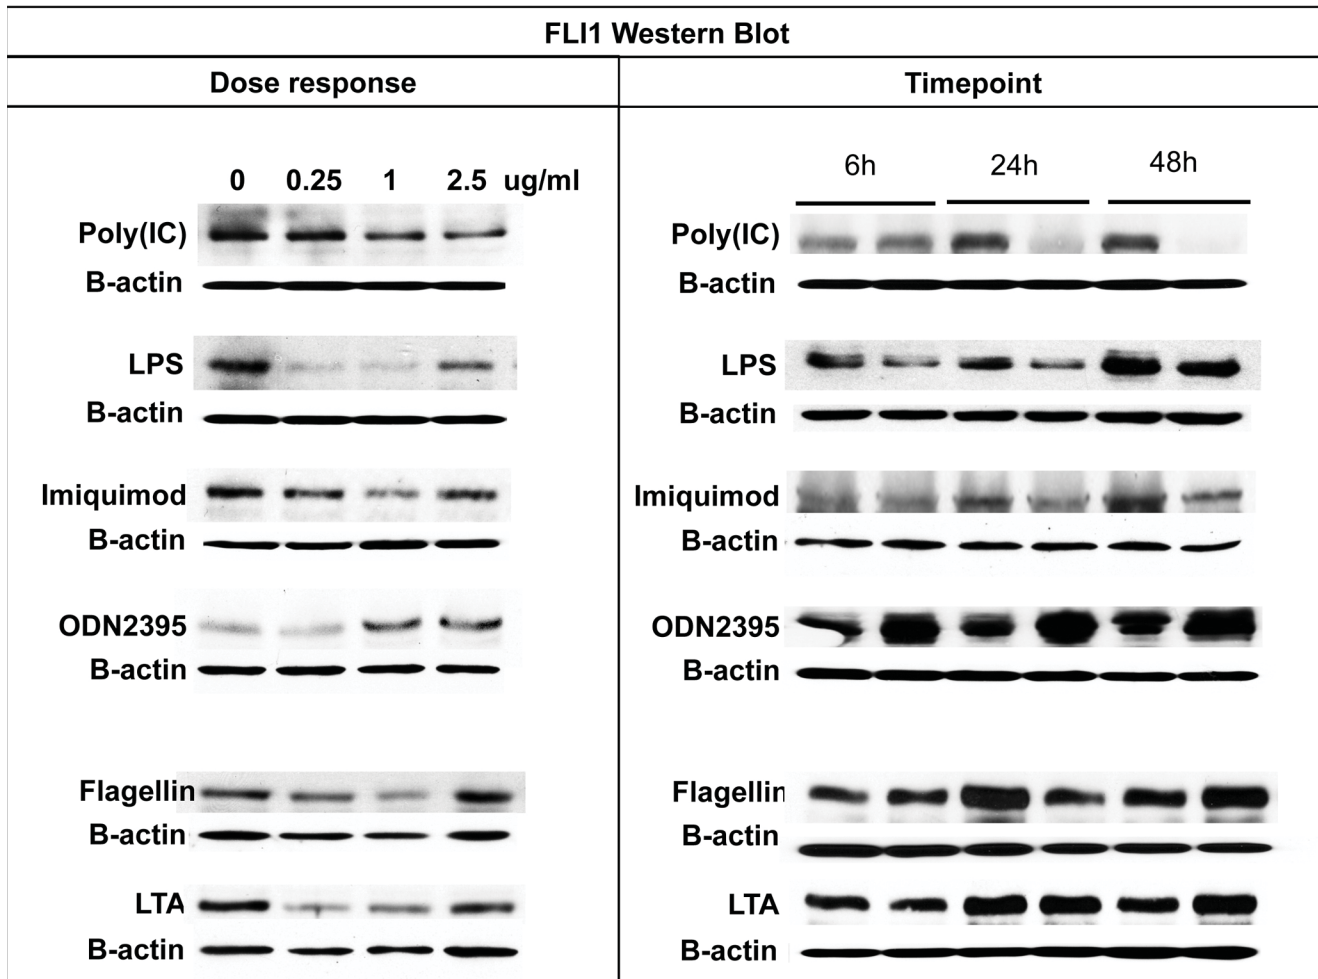

**Supplemental Figure 1. Dose and time dependent FLI1 protein levels in response to selected TLR ligands.**

Confluent HDMECs were treated with Poly(I:C), LPS, Imiquimod, ODN2395, Flagellin and LTA in a dose (left side) and time (right side) dependent manner. Cells were collected for analysis by Western Blot. Representative images are shown from 2 different experiments.

**Supplemental Figure 2.**

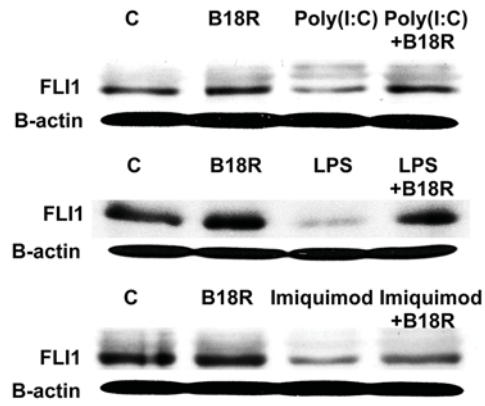

**Supplemental Figure 2. Interferon alpha mediates Fli1 downregulation in HDMECs.**

HDMECs were pretreated with interferon alpha inhibitor (B18R) for 1h and then treated with Poly(I:C), LPS and Imiquimod for another 24h. Fli1, protein level was analyzed by western blot. Representative western blot images are shown from two different experiments.

### Supplemental Figure 3.

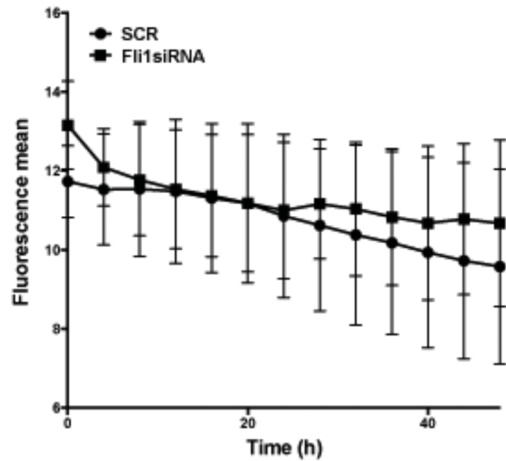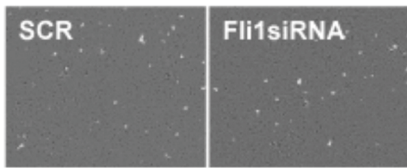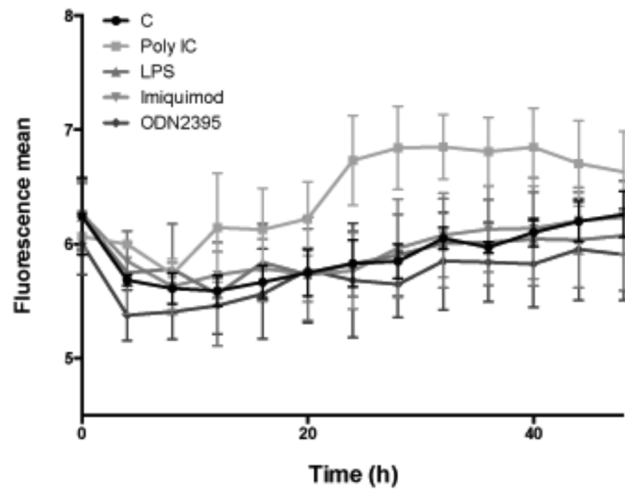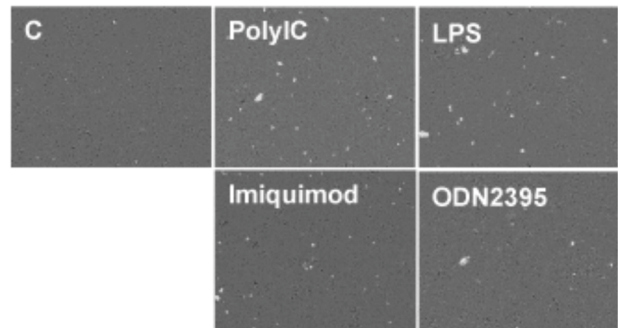

### Supplemental Figure 3. The effect of FLI1 downregulation and selected TLR ligands on apoptosis of HDMECs.

Apoptosis was examined with the Essen BioScience IncuCyte™ Live-Cell Imaging system. 70-80% confluent cells on ImageLock 96-well plate were treated with SCR or Fli1siRNA (A) or Poly(I:C), LPS, Imiquimod and ODN2395 (B) and 50µl of the Annexin V reagent was added per well. Images were captured every 3h for total of 48h. Data represents n=3 well each point with 3 different cell cultures.

**Supplemental Table I. Human primers used for real-time PCR**

|               | Forward 5' to 3'      | Reverse 5' to 3'       |
|---------------|-----------------------|------------------------|
| ET-1          | gctcgtccctgatggataaaa | ccatacggacaacgtgct     |
| FLI1          | ggatggcaaggaactgtgtaa | ggttgattataggccagcagtg |
| FOXO3A        | cttcaaggataagggcgaca  | cgactatgcagtgacagggtg  |
| TGF $\beta$ 1 | gcagcacgtggagctgta    | cagccggtgctgaggta      |
| TGF $\beta$ 2 | ccttctcccctccgaac     | agagcacctgggactgtctg   |
| TGF $\beta$ 3 | aagaagcgggctttggac    | cgcacacagcagttctcc     |
| SNAIL1        | gctgcaggactctaaccaga  | atctccggaggtgggatg     |
